# Supplementary material
Source: Springer Nature journal article supplement (https://www.springermedizin.de/resource/supplementary/13058_2013_3583_MOESM1_ESM.pdf/9703864)
Supplement: MOESM1 [file 9703864]

## Supplemental Table 1. Diet Formulations

### Diet I

| Ingredients (g/100 g) |                    | Low Fat Diet | High Fat Diet |
|-----------------------|--------------------|--------------|---------------|
| Fat                   | Corn Oil           | 4.731        | 6.3715        |
|                       | Lard               | 0.4257       | 28.315        |
| Carbohydrate          | Dextrin            | 48.6172      | 18.9872       |
|                       | Sucrose            | 16.558       | 6.3715        |
| Protein               | Casein             | 19.87        | 26.76         |
|                       | DL Methionine      | 0.1419       | 0.1911        |
| Fiber                 | Cellulose          | 1.4193       | 1.9114        |
|                       | Inulin             | 1.4193       | 1.9114        |
| Vitamins              | RP Vitamin Mix     | 1.8924       | 2.5486        |
|                       | Choline Chloride   | 0.1892       | 0.2548        |
| Minerals              | RP Mineral Mix #10 | 4.731        | 6.371         |
| <b>Energy</b>         |                    |              |               |
| kcal density/g        |                    | 3.87         | 5.21          |
| % kcal                | Fat                | 12           | 59.9          |
|                       | Carbohydrate       | 69.3         | 21.4          |
|                       | Protein            | 18.6         | 18.6          |

Low fat diets contained a yellow dye, whereas high fat diets contained a blue dye. Diet I: TestDiet, PMI Nutrition International LLC, St. Louis, MO

### Diet II

| Ingredients (g/100 g) |                                       | Low Fat Diet | High Fat Diet |
|-----------------------|---------------------------------------|--------------|---------------|
| Fat                   | Corn Oil                              | 2.369        | 16.1498       |
|                       | Lard                                  | 1.8957       | 31.6537       |
| Carbohydrate          | Corn Starch                           | 54.407       | 8.888         |
|                       | Maltodextrin                          | 11.848       | 16.1498       |
| Protein               | Casein                                | 18.987       | 25.8397       |
|                       | L-cystine                             | 0.2843       | 0.3876        |
| Fiber                 | Cellulose                             | 4.7393       | 6.4599        |
| Vitamins              | Vitamin Mix V10001                    | 0.9479       | 1.2919        |
|                       | Choline Bitartrate                    | 0.1896       | 0.2584        |
| Minerals              | Mineral Mix S10026                    | 0.9479       | 0.1286        |
|                       | DiCalcium Phosphate                   | 1.2322       | 1.6795        |
|                       | Calcium Carbonate                     | 0.5213       | 0.7106        |
|                       | Potassium Citrate, 1 H <sub>2</sub> O | 1.5639       | 2.1318        |
| <b>Energy</b>         |                                       |              |               |
| kcal density/g        |                                       | 3.8          | 5.2           |
| % kcal                | Fat                                   | 10           | 60            |
|                       | Carbohydrate                          | 70           | 20            |
|                       | Protein                               | 20           | 20            |

Diet II: Research Diets, Inc. New Brunswick, NJ
